# Supplementary material
Source: publisher figshare collection journal article supplement (https://sage.figshare.com/ndownloader/files/17985722)
Supplement: Supplementary file 1 [file 17985722]

#### ---- Data Preparation ---- ####

require(devtools) #1.13.3
#install_github("paytonjjones/bootnet") #2cb60bc
## adapted version, allows for expected influence & bridge metrics
require(mice) #2.30
require(VIM) #4.7.0
require(foreign) #0.8-69
require(qgraph) #1.4.4
require(networktools) #1.1.1
require(ggm) #2.3
require(bootnet) #1.0.2
require(gridExtra) #2.3
require(ppcor) #1.1

T1 <- read.spss("MOSAIC_All data_T1.sav", to.data.frame=T) ## baseline
T3 <- read.spss("MOSAIC_All data_T3.sav", to.data.frame=T) ## 6 month follow up
T4 <- read.spss("MOSAIC_All data_T4.sav", to.data.frame=T) ## 12 month follow up
T5 <- read.spss("MOSAIC_All data_T5.sav", to.data.frame=T) ## 24 month follow up
full_data <- cbind(T1, T3, T4, T5)

nodenames <- c("avoideat", "binge", "bodydisc", 
               "dietrule", "emptystom", "excesexer",
               "expodisc",  "fearwtgain", 
               "feelfat", "flatstom", "foodavoid", 
               "guilt","losewt", "losscontrol", 
               "overeat", "preoc", "restrict", 
               "secreteat", "shapedis","shapeimport", 
               "socialeat", 'vomit', "weigh", 
               'wtdis', "wtimport", "preoc_fd")
vars <- c("AvoidanceOfEatingShapeampWeight","ObjectiveBulimicDaysMth1","Discomfortseeingbody",
          "DietaryRulesShapeampWeight", "EmptyStomachShapeampWeight", "DrivenExerciseDaysmonth1",
          "Discomfortaboutexposure", "FearofWeightGainMonth1",
          "FeelingFatMonth1", "Flat_Stomach", "FoodAvoidanceShapeampWeight",
          "GuiltEating", "DesireToLoseWeight", "FearLossOfControl", 
          "ObjectiveOvereatEpisodesMth1", "PreoccupationSW", "RestraintOverEatingShapeampWeight",
          "SecretEating", "DissatisfactionShape", "ImportanceShape1",
          "SocialEating", "SelfInducedVomitingEpisodesMonth1", "ReactionToWeighing",
          "DissatisfactionWeight", "ImportanceWeight1", "PreoccupationFEampC"
          )
vars_all <- c("EDE_RestraintOverEatingShapeampWeight_T1", "EDE_AvoidanceOfEatingShapeampWeight_T1",
              "EDE_FoodAvoidanceShapeampWeight_T1", "EDE_DietaryRulesShapeampWeight_T1",
              "EDE_EmptyStomachShapeampWeight_T1", 
              "EDE_PreoccupationFEampC_T1", "EDE_FearLossOfControl_T1", "EDE_SecretEating_T1",
              "EDE_SocialEating_T1", "EDE_GuiltEating_T1",
              "EDE_Flat_Stomach_T1", "", "EDE_ImportanceShape1_T1",
              "EDE_FearofWeightGainMonth1_T1", "EDE_DissatisfactionShape_T1", "EDE_Discomfortseeingbody_T1",
              "EDE_Discomfortaboutexposure_T1", "EDE_FeelingFatMonth1_T1",
              "EDE_ImportanceWeight1_T1","EDE_ReactionToWeighing_T1", "EDE_DissatisfactionWeight_T1",
              "EDE_DesireToLoseWeight_T1",
              "EDE_ObjectiveBulimicDaysMth1_T1", 
              "EDE_ObjectiveOvereatEpisodesMth1_T1",
              "EDE_SelfInducedVomitingEpisodesMonth1_T1",
              "EDE_DrivenExerciseDaysmonth1_T1",
              "EDE_DietaryRestrcitionOutsideBulMonth1_T1")
varsT1 <- paste("EDE_", vars, "_T1", sep="")
varsT2 <- paste("EDE_", vars, "_T2", sep="")
varsT3 <- paste("EDE_", vars, "_T3", sep="")
varsT4 <- paste("EDE_", vars, "_T4", sep="")
varsT5 <- paste("EDE_", vars, "_T5", sep="")
DASSnames <- c("winddown", "drymouth", "anhed", "breath", "initi", "overreact",
               "tremble", "nerveng", "wpanic", "lookforward", "agitate", "drelax",
               "blue", "frustr", "panic", "unenthused", "worthless", "touchy",
               "heartrate", "scared", "meaningless")
DASSgroups <- c("Stress", "Anxiety", "Depression", "Anxiety",
                "Depression", "Stress", "Anxiety","Stress","Anxiety",
                "Depression", "Stress", "Stress", "Depression", "Stress",
                "Anxiety", "Depression","Depression","Stress", "Anxiety",
                "Anxiety","Depression")
DASSgroups2 <- c("Anxiety/Stress", "Anxiety/Stress", "Depression", "Anxiety/Stress",
                 "Depression", "Anxiety/Stress", "Anxiety/Stress","Anxiety/Stress","Anxiety/Stress",
                 "Depression", "Anxiety/Stress", "Anxiety/Stress", "Depression", "Anxiety/Stress",
                 "Anxiety/Stress", "Depression","Depression","Anxiety/Stress", "Anxiety/Stress",
                 "Anxiety/Stress","Depression")
nodenames_DASS <- c("DASS1",  "DASS2" , "DASS3" , "DASS4" , "DASS5" , "DASS6" ,
                    "DASS7" , "DASS8"  ,"DASS9" , "DASS10", "DASS11" ,"DASS12", "DASS13" ,"DASS14", "DASS15",
                    "DASS16" ,"DASS17", "DASS18" ,"DASS19" ,"DASS20" ,"DASS21")
nodenames_DASS_T1 <- paste(nodenames_DASS, "_T1", sep="")
nodenames_DASS_T3 <- paste(nodenames_DASS, "_T3", sep="")
nodenames_DASS_T4 <- paste(nodenames_DASS, "_T4", sep="")
nodenames_DASS_T5 <- paste(nodenames_DASS, "_T5", sep="")

netdata_T1 <- full_data[9:150,varsT1]
netdata_T3 <- full_data[9:150,varsT3]
netdata_T4 <- full_data[9:150,varsT4]
netdata_T5 <- full_data[9:150,varsT5]
comorbid_T1 <- full_data[9:150, c(varsT1, nodenames_DASS_T1)]
comorbid_T3 <- full_data[9:150, c(varsT3, nodenames_DASS_T3)]
comorbid_T4 <- full_data[9:150, c(varsT4, nodenames_DASS_T4)]
comorbid_T5 <- full_data[9:150, c(varsT5, nodenames_DASS_T5)]
netdata_T1 <- apply(netdata_T1, 2, function(x) as.numeric(as.character(x)))
netdata_T3 <- apply(netdata_T3, 2, function(x) as.numeric(as.character(x)))
netdata_T4 <- apply(netdata_T4, 2, function(x) as.numeric(as.character(x)))
netdata_T5 <- apply(netdata_T5, 2, function(x) as.numeric(as.character(x)))
comorbid_T1 <- apply(comorbid_T1, 2, function(x) as.numeric(as.character(x)))
comorbid_T3 <- apply(comorbid_T3, 2, function(x) as.numeric(as.character(x)))
comorbid_T4 <- apply(comorbid_T4, 2, function(x) as.numeric(as.character(x)))
comorbid_T5 <- apply(comorbid_T5, 2, function(x) as.numeric(as.character(x)))
colnames(netdata_T1) <- colnames(netdata_T3) <- colnames(netdata_T4) <- colnames(netdata_T5)<- nodenames
colnames(comorbid_T1) <- colnames(comorbid_T3) <- colnames(comorbid_T4) <- colnames(comorbid_T5)<- c(nodenames, DASSnames)
netdata_T1 <- data.frame(netdata_T1)
netdata_T3 <- data.frame(netdata_T3)
netdata_T4 <- data.frame(netdata_T4)
netdata_T5 <- data.frame(netdata_T5)
comorbid_T1 <- data.frame(comorbid_T1)
comorbid_T3 <- data.frame(comorbid_T3)
comorbid_T4 <- data.frame(comorbid_T4)
comorbid_T5 <- data.frame(comorbid_T5)

## Missing participants from attrition deleted if all relevant data missing
## Missing data from individual items imputed with mice package

## First, eliminate individuals who are entirely missing at each time frame
allna <- function(x){
  all(is.na(x))
}
badrows <- function(x){
  apply(x, 1, allna)
}
badrows(netdata_T1)

comorbid_T1 <- comorbid_T1[!badrows(comorbid_T1),]
comorbid_T3 <- comorbid_T3[!badrows(comorbid_T3),]
comorbid_T4 <- comorbid_T4[!badrows(comorbid_T4),]
comorbid_T5 <- comorbid_T5[!badrows(comorbid_T5),]

mice_plot_T1 <- aggr(comorbid_T1, col=c('navyblue','yellow'),numbers=TRUE, sortVars=TRUE,labels=names(netdata_T1), cex.axis=.7,gap=3, ylab=c("Missing data","Pattern"))
mice_plot_T3 <- aggr(comorbid_T3, col=c('navyblue','yellow'),numbers=TRUE, sortVars=TRUE,labels=names(netdata_T1), cex.axis=.7,gap=3, ylab=c("Missing data","Pattern"))
mice_plot_T4 <- aggr(comorbid_T4, col=c('navyblue','yellow'),numbers=TRUE, sortVars=TRUE,labels=names(netdata_T1), cex.axis=.7,gap=3, ylab=c("Missing data","Pattern"))
mice_plot_T5 <- aggr(comorbid_T5, col=c('navyblue','yellow'),numbers=TRUE, sortVars=TRUE,labels=names(netdata_T1), cex.axis=.7,gap=3, ylab=c("Missing data","Pattern"))

comorbid_T1_stab <- mice(comorbid_T1, m=1, maxit = 50, method = 'pmm', seed = 500)
comorbid_T3_stab <- mice(comorbid_T3, m=1, maxit = 50, method = 'pmm', seed = 500)
comorbid_T4_stab <- mice(comorbid_T4, m=1, maxit = 50, method = 'pmm', seed = 500)
comorbid_T5_stab <- mice(comorbid_T5, m=1, maxit = 50, method = 'pmm', seed = 500)

comorbid_T1 <- complete(comorbid_T1_stab,1)
comorbid_T3 <- complete(comorbid_T3_stab,1)
comorbid_T4 <- complete(comorbid_T4_stab,1)
comorbid_T5 <- complete(comorbid_T5_stab,1)

netdata_T1 <- comorbid_T1[,nodenames]
netdata_T3 <- comorbid_T3[,nodenames]
netdata_T4 <- comorbid_T4[,nodenames]
netdata_T5 <- comorbid_T5[,nodenames]

netdata_T1 <- netdata_T1[!badrows(netdata_T1),]
netdata_T3 <- netdata_T3[!badrows(netdata_T3),]
netdata_T4 <- netdata_T4[!badrows(netdata_T4),]
netdata_T5 <- netdata_T5[!badrows(netdata_T5),]

#### ---- Generate GLASSO Networks ---- #### 

T1_glasso <- EBICglasso(cor(netdata_T1, method="spearman"),gamma=0.0, n=nrow(netdata_T1))
T3_glasso <- EBICglasso(cor(netdata_T3, method="spearman"),gamma=0.0, n=nrow(netdata_T3))
T4_glasso <- EBICglasso(cor(netdata_T4, method="spearman"),gamma=0.0, n=nrow(netdata_T4))
T5_glasso <- EBICglasso(cor(netdata_T5, method="spearman"),gamma=0.0, n=nrow(netdata_T5))

T1_comorbid <- EBICglasso(cor(comorbid_T1, method="spearman"),gamma=0.0, n=nrow(netdata_T1))
T3_comorbid <- EBICglasso(cor(comorbid_T3, method="spearman"),gamma=0.0, n=nrow(netdata_T3))
T4_comorbid <- EBICglasso(cor(comorbid_T4, method="spearman"),gamma=0.0, n=nrow(netdata_T4))
T5_comorbid <- EBICglasso(cor(comorbid_T5, method="spearman"),gamma=0.0, n=nrow(netdata_T5))

#### ---- Stability of GLASSOs (bootnet) ---- ####

#Create a custom function to estimate EBICglasso with my desired arguments 
myglasso <- function(x) {EBICglasso(cor(x, method="spearman"),gamma=0.0, n=nrow(x))}

#Use this to create a graph object with estimateNetwork function
T1_glasso_eN <- estimateNetwork(netdata_T1, fun=myglasso)
T3_glasso_eN <- estimateNetwork(netdata_T3, fun=myglasso)
T4_glasso_eN <- estimateNetwork(netdata_T4, fun=myglasso)
T5_glasso_eN <- estimateNetwork(netdata_T5, fun=myglasso)
T1_comorbid_eN <- estimateNetwork(comorbid_T1, fun=myglasso)
T3_comorbid_eN <- estimateNetwork(comorbid_T3, fun=myglasso)
T4_comorbid_eN <- estimateNetwork(comorbid_T4, fun=myglasso)
T5_comorbid_eN <- estimateNetwork(comorbid_T5, fun=myglasso)
T1_comorbid_d <- estimateNetwork(comorbid_T1[,c(nodenames, DASSnames[DASSgroups2=="Depression"])], fun=myglasso)
T3_comorbid_d <- estimateNetwork(comorbid_T3[,c(nodenames, DASSnames[DASSgroups2=="Depression"])], fun=myglasso)
T4_comorbid_d <- estimateNetwork(comorbid_T4[,c(nodenames, DASSnames[DASSgroups2=="Depression"])], fun=myglasso)
T5_comorbid_d <- estimateNetwork(comorbid_T5[,c(nodenames, DASSnames[DASSgroups2=="Depression"])], fun=myglasso)
T1_comorbid_a <- estimateNetwork(comorbid_T1[,c(nodenames, DASSnames[DASSgroups2=="Anxiety/Stress"])], fun=myglasso)
T3_comorbid_a <- estimateNetwork(comorbid_T3[,c(nodenames, DASSnames[DASSgroups2=="Anxiety/Stress"])], fun=myglasso)
T4_comorbid_a <- estimateNetwork(comorbid_T4[,c(nodenames, DASSnames[DASSgroups2=="Anxiety/Stress"])], fun=myglasso)
T5_comorbid_a <- estimateNetwork(comorbid_T5[,c(nodenames, DASSnames[DASSgroups2=="Anxiety/Stress"])], fun=myglasso)

# ED only:
set.seed(1)
T1_glasso_boot <- bootnet(T1_glasso_eN, nBoots = 500, type = "case", statistics="expectedInf", caseN=20)
set.seed(1)
T3_glasso_boot <- bootnet(T3_glasso_eN, nBoots = 500, type = "case", statistics="expectedInf", caseN=20)
set.seed(1) 
T4_glasso_boot <- bootnet(T4_glasso_eN, nBoots = 500, type = "case", statistics="expectedInf", caseN=20)
set.seed(1) 
T5_glasso_boot <- bootnet(T5_glasso_eN, nBoots = 500, type = "case", statistics="expectedInf", caseN=20)

# Comorbid 1:
comms <- c(rep("EDE", 26), rep("DASS", 21))

set.seed(1)
T1_comorbid_boot <- bootnet(T1_comorbid_eN, nBoots = 500, type = "case", statistics=c("expectedInf", "bridge_expectedInf"),communities=comms, caseN=20)
set.seed(1)
T3_comorbid_boot <- bootnet(T3_comorbid_eN, nBoots = 500, type = "case", statistics=c("expectedInf", "bridge_expectedInf"),communities=comms, caseN=20)
set.seed(1)
T4_comorbid_boot <- bootnet(T4_comorbid_eN, nBoots = 500, type = "case", statistics=c("expectedInf", "bridge_expectedInf"),communities=comms, caseN=20)
set.seed(1)
T5_comorbid_boot <- bootnet(T5_comorbid_eN, nBoots = 500, type = "case", statistics=c("expectedInf", "bridge_expectedInf"),communities=comms, caseN=20)

# Comorbid Depression:
comms_d <- c(rep("EDE", 26), rep("Depression", 7))

set.seed(1) 
T1_comorbid_boot_d <- bootnet(T1_comorbid_d, nBoots = 500, type = "case", statistics=c("expectedInf", "bridge_expectedInf"),communities=comms_d, caseN=20)
set.seed(1)
T3_comorbid_boot_d <- bootnet(T3_comorbid_d, nBoots = 500, type = "case", statistics=c("expectedInf", "bridge_expectedInf"),communities=comms_d, caseN=20)
set.seed(1)
T4_comorbid_boot_d <- bootnet(T4_comorbid_d, nBoots = 500, type = "case", statistics=c("expectedInf", "bridge_expectedInf"),communities=comms_d, caseN=20)
set.seed(1)
T5_comorbid_boot_d <- bootnet(T5_comorbid_d, nBoots = 500, type = "case", statistics=c("expectedInf", "bridge_expectedInf"),communities=comms_d, caseN=20)

# Comorbid Anxiety/Stress
comms_a <- c(rep("EDE", 26), rep("Anxiety/Stress", 14))

set.seed(1)
T1_comorbid_boot_a <- bootnet(T1_comorbid_a, nBoots = 500, type = "case", statistics=c("expectedInf", "bridge_expectedInf"),communities=comms_a, caseN=20)
set.seed(1) #unexpected processing error at seed 500
T3_comorbid_boot_a <- bootnet(T3_comorbid_a, nBoots = 500, type = "case", statistics=c("expectedInf", "bridge_expectedInf"),communities=comms_a, caseN=20)
set.seed(1)
T4_comorbid_boot_a <- bootnet(T4_comorbid_a, nBoots = 500, type = "case", statistics=c("expectedInf", "bridge_expectedInf"),communities=comms_a, caseN=20)
set.seed(1)
T5_comorbid_boot_a <- bootnet(T5_comorbid_a, nBoots = 500, type = "case", statistics=c("expectedInf", "bridge_expectedInf"),communities=comms_a, caseN=20)

## Stability coefficients

corStability(T1_glasso_boot, statistics="expectedInf") ## .75
corStability(T3_glasso_boot, statistics="expectedInf") ## .71
corStability(T4_glasso_boot, statistics="expectedInf") ## .64
corStability(T5_glasso_boot, statistics="expectedInf") ## .64

corStability(T1_comorbid_boot, statistics=c("expectedInf", "bridge_expectedInf")) ## .27, .67
corStability(T3_comorbid_boot, statistics=c("expectedInf", "bridge_expectedInf")) ## .19, .56
corStability(T4_comorbid_boot, statistics=c("expectedInf", "bridge_expectedInf")) ## .23, .602
corStability(T5_comorbid_boot, statistics=c("expectedInf", "bridge_expectedInf")) ## .305, .562

# Comorbid 1:
comms <- c(rep("EDE", 26), rep("DASS", 21))

set.seed(1)
T1_comorbid_boot_np <- bootnet(T1_comorbid_eN, nBoots = 500, type = "nonparametric", statistics=c("bridge_expectedInf"),
                               communities=comms)

# Comorbid Depression:
comms_d <- c(rep("EDE", 26), rep("Depression", 7))
set.seed(1) 
T1_comorbid_boot_d_np <- bootnet(T1_comorbid_d, nBoots = 500, type = "nonparametric", statistics=c("bridge_expectedInf"),
                                 communities=comms_d, useCommunities=c("EDE", "Depression"))
# Comorbid Anxiety/Stress
comms_a <- c(rep("EDE", 26), rep("Anxiety/Stress", 14))
set.seed(1)
T1_comorbid_boot_a_np <- bootnet(T1_comorbid_a, nBoots = 500, type = "nonparametric", statistics=c("bridge_expectedInf"),
                                 communities=comms_a,useCommunities=c("EDE", "Anxiety/Stress"))

g5 <- plot(T1_comorbid_boot_np, plot="difference", statistics="bridge_expectedInf")
g6 <- plot(T1_comorbid_boot_d_np, plot="difference", statistics="bridge_expectedInf")
g7 <- plot(T1_comorbid_boot_a_np, plot="difference", statistics="bridge_expectedInf")

g1 + labs(title = "Baseline, EI")
g2 + labs(title = "6 Months, EI")
g3 + labs(title = "12 Months, EI")
g4 + labs(title = "24 Months, EI")
g5 + labs(title = "Baseline, Bridge EI, AN & Depression/Anxiety/Stress")
g6 + labs(title = "Baseline, Bridge EI, AN & Depression")
g7 + labs(title = "Baseline, Bridge EI, AN & Anxiety/Stress")

#### ---- Comorbidity ---- ########

## community analysis
EDE_DASS_T1 <- T1_comorbid
g <- igraph::graph_from_adjacency_matrix(EDE_DASS_T1, mode = "upper", 
                                         diag = FALSE, weighted = TRUE)
set.seed(500)
comm<-igraph::spinglass.community(g, spins = 4)
colnames(EDE_DASS_T1)
comm$membership[c(rep(FALSE, 26), DASSgroups=="Depression")]
comm$membership[c(rep(FALSE, 26), DASSgroups=="Anxiety")]
comm$membership[c(rep(FALSE, 26), DASSgroups=="Stress")]
## Anxiety and stress are the same community

## Treating DASS as two communities (Depression, Anxiety/Stress) for this plot

require(RColorBrewer)
qgraph(EDE_DASS_T1, groups=c(rep("Eating Disorder", 26), DASSgroups2), labels=colnames(EDE_DASS_T1),
       layout="spring", label.norm="OOOO", label.prop=.95,
       color=c("#bae1d6","#efbf99", "#d5d4e8"))

## Bridges only had sufficient stability at T1 and T5
bridge_T1 <- bridge(getWmat(T1_comorbid_eN), communities=c(rep("Eating Disorder", 26), rep("DASS", 21)))
bridge_T3 <- bridge(getWmat(T3_comorbid_eN), communities=c(rep("Eating Disorder", 26), rep("DASS", 21))) ## UNSTABLE
bridge_T4 <- bridge(getWmat(T4_comorbid_eN), communities=c(rep("Eating Disorder", 26), rep("DASS", 21))) ## UNSTABLE
bridge_T5 <- bridge(getWmat(T5_comorbid_eN), communities=c(rep("Eating Disorder", 26), rep("DASS", 21)))

bridge_graph <- bridge_T1

bridge_graph$communities <- c(rep("Eating Disorder", 26), DASSgroups2) ## Just for coloring
bridge_graph$`Bridge Expected Influence (1-step)` <- bridge_graph$`Bridge Expected Influence (1-step)`[order(bridge_graph$communities)]
bridge_graph$`Bridge Strength` <- bridge_graph$`Bridge Strength`[order(bridge_graph$communities)]
bridge_graph$communities <- bridge_graph$communities[order(bridge_graph$communities)]
plot(bridge_graph, include="Bridge Expected Influence (1-step)", RColorBrewer="Dark2", order="given")

## Bridges w/Depression Only
bridge_T1_D_only <- bridge(getWmat(T1_comorbid_d), communities=c(rep("Eating Disorder", 26), rep("Depression", 7)))
plot(bridge_T1_D_only, include="Bridge Expected Influence (1-step)", RColorBrewer="Dark2", order="given")

## Bridges w/Anxiety-Stress Only
bridge_T1_AS_only <- bridge(getWmat(T1_comorbid_a), communities=c(rep("Eating Disorder", 26), rep("Anxiety-Stress", 14)))
plot(bridge_T1_AS_only, include="Bridge Expected Influence (1-step)", RColorBrewer="Dark2", order="given")

#### ---- Check for common confounds ---- ####

## Centrality and variance -- uncorrelated
scalevar <- function(x){
  var(scale(x))
}

cor.test(expectedInf(T1_glasso)$step1, apply(netdata_T1, 2, var)) ## raw variance
cor.test(expectedInf(T3_glasso)$step1, apply(netdata_T3, 2, var)) 
cor.test(expectedInf(T4_glasso)$step1, apply(netdata_T4, 2, var)) 
cor.test(expectedInf(T5_glasso)$step1, apply(netdata_T5, 2, var)) 

cor.test(expectedInf(T1_glasso)$step1, apply(netdata_T1, 2, scalevar)) ## scaled variance
cor.test(expectedInf(T3_glasso)$step1, apply(netdata_T3, 2, scalevar)) 
cor.test(expectedInf(T4_glasso)$step1, apply(netdata_T4, 2, scalevar)) 
cor.test(expectedInf(T5_glasso)$step1, apply(netdata_T5, 2, scalevar)) 

## Not significant at any time point

## Stability across time points:
## Centrality:
cor(cbind(expectedInf(T1_glasso)$step1,expectedInf(T3_glasso)$step1,expectedInf(T4_glasso)$step1,expectedInf(T5_glasso)$step1)) ## pretty good

## Bridge centrality:
cor(cbind(bridge_T1$`Bridge Expected Influence (1-step)`,bridge_T3$`Bridge Expected Influence (1-step)`,bridge_T4$`Bridge Expected Influence (1-step)`,bridge_T5$`Bridge Expected Influence (1-step)`)) ## pretty good
## Not quite as similar across time points, but bridge centrality was less stable, so this makes sense

## ---- Prognostics & Clinical Outcomes  ----

## Recovery criteria in Schmidt et al.:
## Recovered: BMI > 18.5, EDE_global < 2.77
## Partially recovered: one of above criteria met but not the other, OR 18.5 > BMI > 17.5
full_data$EDE_Global_Score_T3 <- as.numeric(as.character(full_data$EDE_Global_Score_T3))
full_data$EDE_Global_Score_T4 <- as.numeric(as.character(full_data$EDE_Global_Score_T4))
full_data$EDE_Global_Score_T5 <- as.numeric(as.character(full_data$EDE_Global_Score_T5))
full_data$EDE_BMI_T4 <- as.numeric(as.character(full_data$EDE_BMI_T4))
full_data$EDE_BMI_T5 <- as.numeric(as.character(full_data$EDE_BMI_T5))

full_data$recovery <- factor(rep(NA,150), levels=c("Recovered","Partially_Recovered","Nonrecovered"))
for(i in 9:150){ ## First 8 are pilots
  if(is.na(full_data$EDE_BMI_T3[i] )){
    full_data$recovery[i] <- NA
  } else if(full_data$EDE_BMI_T3[i] > 18.5 & full_data$EDE_Global_Score_T3[i] < 2.77){
    full_data$recovery[i] <- "Recovered"
  } else if (full_data$EDE_BMI_T3[i] > 17.5){
    full_data$recovery[i] <- "Partially_Recovered"
  } else if (full_data$EDE_Global_Score_T3[i] < 2.77){
    full_data$recovery[i] <- "Partially_Recovered"
  } else {
    full_data$recovery[i] <- "Nonrecovered"
  }
}

table(full_data$recovery) 

full_data$recovery_T4 <- factor(rep(NA,150), levels=c("Recovered","Partially_Recovered","Nonrecovered"))
for(i in 9:150){ ## First 8 are pilots
  if(is.na(full_data$EDE_BMI_T4[i]) | is.na(full_data$EDE_Global_Score_T4[i])){
    full_data$recovery_T4[i] <- NA
  } else if(full_data$EDE_BMI_T4[i] > 18.5 & full_data$EDE_Global_Score_T4[i] < 2.77){
    full_data$recovery_T4[i] <- "Recovered"
  } else if (full_data$EDE_BMI_T4[i] > 17.5){
    full_data$recovery_T4[i] <- "Partially_Recovered"
  } else if (full_data$EDE_Global_Score_T4[i] < 2.77){
    full_data$recovery_T4[i] <- "Partially_Recovered"
  } else {
    full_data$recovery_T4[i] <- "Nonrecovered"
  }
}

table(full_data$recovery_T4)

full_data$recovery_T5 <- factor(rep(NA,150), levels=c("Recovered","Partially_Recovered","Nonrecovered"))
for(i in 9:150){ ## First 8 are pilots
  if(is.na(full_data$EDE_BMI_T5[i]) | is.na(full_data$EDE_Global_Score_T5[i])){
    full_data$recovery_T5[i] <- NA
  } else if(full_data$EDE_BMI_T5[i] > 18.5 & full_data$EDE_Global_Score_T5[i] < 2.77){
    full_data$recovery_T5[i] <- "Recovered"
  } else if (full_data$EDE_BMI_T5[i] > 17.5){
    full_data$recovery_T5[i] <- "Partially_Recovered"
  } else if (full_data$EDE_Global_Score_T5[i] < 2.77){
    full_data$recovery_T5[i] <- "Partially_Recovered"
  } else {
    full_data$recovery_T5[i] <- "Nonrecovered"
  }
}

table(full_data$recovery_T4)

## Did having high scores on central items predict a failure to recover?

ei_T1 <- expectedInf(T1_glasso)

## With recovery status
rec_T3 <- ordered(full_data$recovery[9:150], levels=c("Recovered", "Partially_Recovered", "Nonrecovered"))

rec_predict <- cor(cbind(netdata_T1, as.numeric(rec_T3)), method="spearman", use="pairwise.complete.obs")[1:26,27]

## E.g., overall, having higher symptoms at T1 means that you are less likely to recover
cor.test(rec_predict,ei_T1$step1)  
## This is what you'd expect. The most central symptoms are the ones that most inhibit recovery

## With clinical impairment
impair <- full_data$CIA_Total_T3[9:150]
impair_predict <- cor(cbind(netdata_T1, impair), method="spearman", use="pairwise.complete.obs")[1:26,27]
cor.test(impair_predict, ei_T1$step1)

lm1 <- lm(rec_predict~ scale(ei_T1$step1))
plot(as.numeric(scale(ei_T1$step1)), rec_predict,
     main="Central symptoms inhibit recovery", xlab="Expected Influence Centrality (Time 1)", ylab="Association with Recovery Status (Time 3)",
     xlim=c(-2.5,2.5), ylim=c(-0.1,0.4))
abline(lm1)
text(2,-0.03, labels="r =")

lm1_std_beta <- lm(scale(rec_predict)~ scale(ei_T1$step1))
summary(lm1_std_beta)

lm2 <- lm(impair_predict~ scale(ei_T1$step1))
plot(as.numeric(scale(ei_T1$step1)), impair_predict,
     main="Central symptoms predict clinical impairment post-treatment", xlab="Expected Influence Centrality (Time 1)", ylab="Association with clinical impairment (Time 3)",
     xlim=c(-2.5,2.5), ylim=c(0,0.6))
abline(lm2)
text(2,.55, labels="r =")

lm2_std_beta <- lm(scale(impair_predict)~ scale(ei_T1$step1))
summary(lm2_std_beta)

summary(lm1) ## recovery status
summary(lm2) ## clinical impairment

# With BMI

BMI_rev <- full_data$EDE_BMI_T3[9:150] * -1
BMI_predict <- cor(cbind(netdata_T1, BMI_rev), method="spearman", use="pairwise.complete.obs")[1:26,27]
cor.test(BMI_predict, ei_T1$step1)

lm3 <- lm(BMI_predict~ scale(ei_T1$step1))
plot(as.numeric(scale(ei_T1$step1)), BMI_predict,
     main="BMI", xlab="Expected Influence Centrality (Time 1)", ylab="Association with BMI (Time 3)",
     xlim=c(-2.5,2.5), ylim=c(-0.1,0.4))
abline(lm3)
text(2,-0.03, labels="r =")

lm3_std_beta <- lm(scale(BMI_predict)~ scale(ei_T1$step1))
summary(lm3_std_beta)

ggdf <- data.frame(Centrality=as.numeric(scale(ei_T1$step1)), Recovery=rec_predict, Impairment=impair_predict)
g_rec <- ggplot(ggdf, aes(x=Centrality, y=Recovery)) + 
  geom_point()+
  geom_smooth(method=lm, se=F)+
  ggtitle(expression(paste("Central symptoms predict failure to recover (", r^2, " = 0.52)"))) +
  xlab("Expected Influence Centrality (pre-treatment)") +
  ylab("Node Association with Failure to Recover (post-treatment)")
g_imp <- ggplot(ggdf, aes(x=Centrality, y=Impairment)) + 
  geom_point()+
  geom_smooth(method=lm, se=F)+
  ggtitle(expression(paste("Central symptoms predict post-treatment clinical impairment (", r^2, " = 0.55)"))) +
  xlab("Expected Influence Centrality (pre-treatment)") +
  ylab("Node Association with Clinical Impairment (post-treatment)")
grid.arrange(g_rec,g_imp, ncol=2)


#### ---- Other Graphing ---- ####

## All time points plotted at once- expected influence:

ei_all <- data.frame(values=c(expectedInf(T1_glasso)$step1, expectedInf(T3_glasso)$step1, 
                              expectedInf(T4_glasso)$step1,expectedInf(T5_glasso)$step1),
                     xnames=factor(rep(nodenames[1:26], 4), levels=colnames(T1_glasso)[order(colnames(T1_glasso))]),
                     timepoint=c(rep("Time 1", 26),rep("Time 2", 26),
                                 rep("Time 3", 26),rep("Time 4", 26)))

ei_all <- ei_all[order(ei_all$timepoint, ei_all$xnames),]
g1 <-ggplot(ei_all, aes(x=values, y=xnames, colour=timepoint, group=timepoint)) + 
  geom_point() +
  geom_path() +
  ggtitle("Centrality of Anorexia Symptoms") +
  labs(x="", y="", colour="Time Point")+
  theme(axis.text.y = element_text(colour=c(rep(1,26), rep(2,7), rep(3,14))))
g1


op <- par(mfrow=c(2,2))
layoutT1 <- qgraph(T1_glasso, layout="spring", labels=1:26,color=c("#d5d4e8"))$layout
qgraph(T3_glasso,  labels=1:26, layout=layoutT1,color=c("#d5d4e8"))
qgraph(T4_glasso,  labels=1:26, layout=layoutT1, color=c("#d5d4e8"))
qgraph(T5_glasso,  labels=1:26, layout=layoutT1, color=c("#d5d4e8"))
par(op)

qgraph(T1_glasso, layout=layoutT1, labels=colnames(T1_glasso),
       layout="spring", label.norm="OOOO", label.prop=.95,
       color=c("#d5d4e8"))

## OS & Other Information

# Lenovo ThinkPad 11e 3rd Gen Signature Edition
# Edition: Windows 10 Pro
# Version: 1607
# OS Build: 14393.1358
# Processor: Intel(R) Celeron(R) CPU N3150 @ 1.60 GHz 
# RAM: 8.00 GB (7.82 GB usable)
# 64 bit, x64-based processor

# R version information: 
#platform       x86_64-w64-mingw32          
#arch           x86_64                      
#os             mingw32                     
#system         x86_64, mingw32             
#status                                     
#major          3                           
#minor          4.3                         
#year           2017                        
#month          11                          
#day            30                          
#svn rev        73796                      
#language       R                           
#version.string R version 3.4.3 (2017-11-30)

## Anorexia goldbricker
gb_comorbid_T1 <- goldbricker(comorbid_T1, p=0.1, corMin=0.7)
gb_comorbid_T1
gb_comorbid_T3 <- goldbricker(comorbid_T3, p=0.1, corMin=0.7)
gb_comorbid_T3
gb_comorbid_T4 <- goldbricker(comorbid_T4, p=0.1, corMin=0.7)
gb_comorbid_T4
gb_comorbid_T5 <- goldbricker(comorbid_T5, p=0.1, corMin=0.7)
gb_comorbid_T5
#save.image("goldbricker_supplemental.Rdata")
